# Supplementary material
Source: PubMed Central journal article supplement (PMC3349844)

### Supplemental Figure 3: Codon 61 (Reverse)

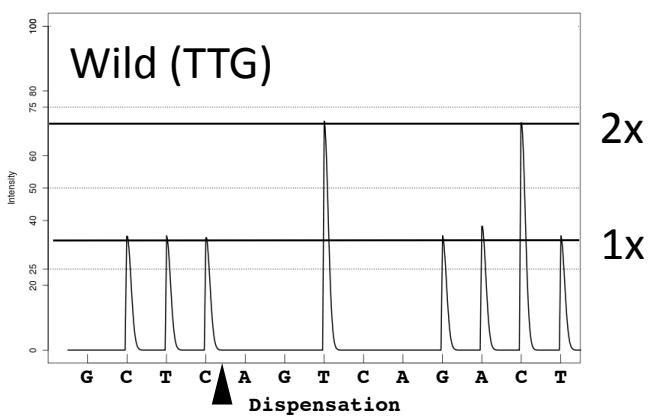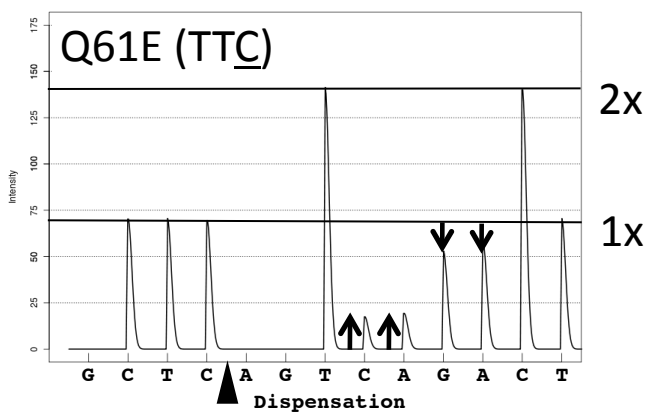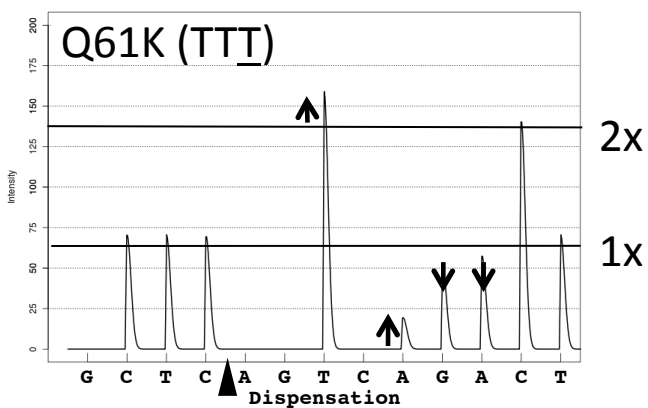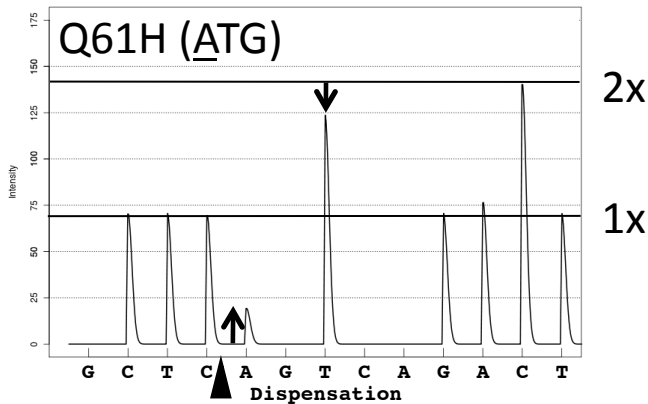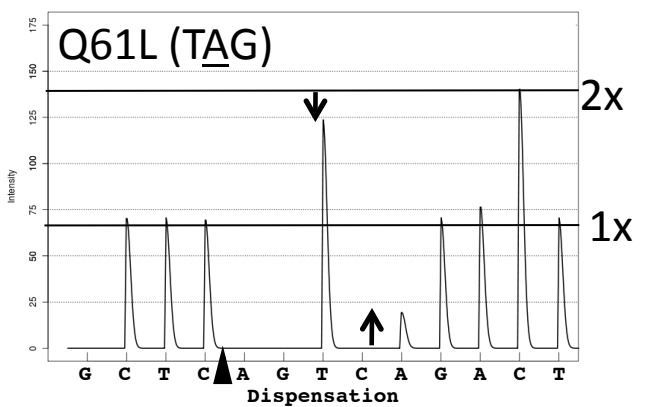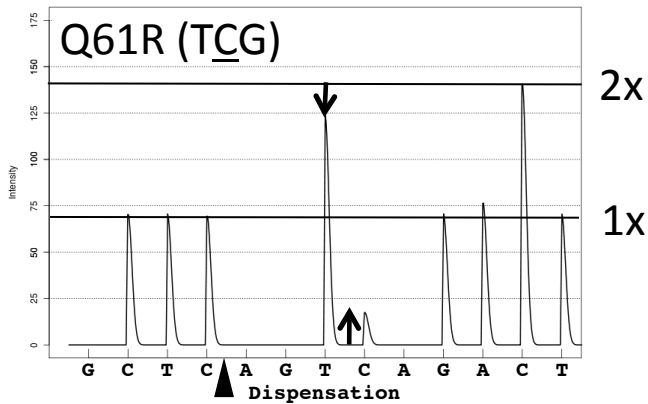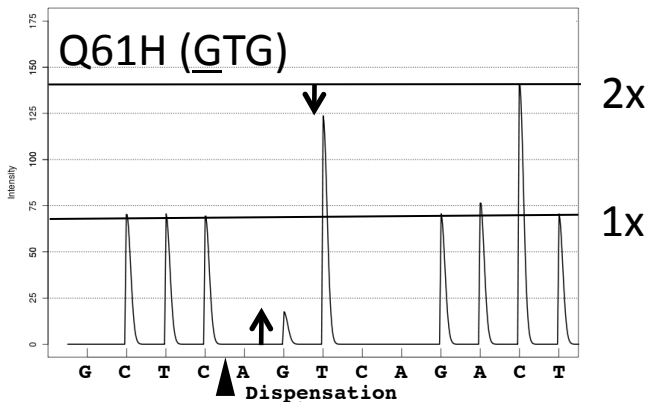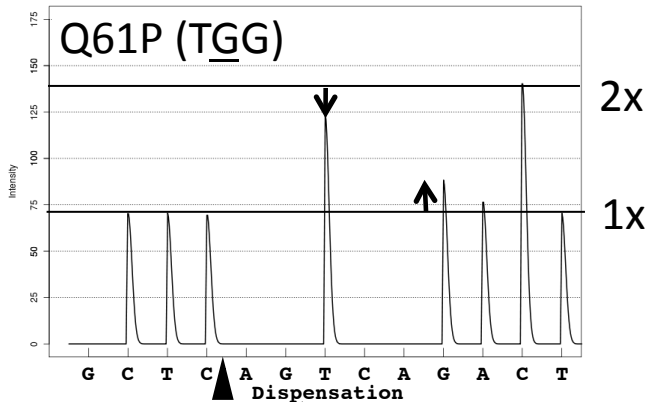

Supplement: mmc3.pdf [file mmc3.pdf]
